# Supplementary material for: Expression of Caveolin 1 Is Enhanced by DNA Demethylation during Adipocyte Differentiation. Status of Insulin Signaling
Source: PubMed Central journal article supplement (PMC3994010; doi:10.1371/journal.pone.0095100), 2014-04-21
Supplement: pone.0095100.s001.pdf [file pone.0095100.s001.pdf]

**Caveolin 1: Mus musculus strain C57BL/6J chromosome 6, GRCm38.p1  
C57BL/6J, from 4776 bp to 6715 bp.  
NCBI: NC\_000072.6**

ttgaacctct aagtaaaatt ttctgcagtt gaaaatactc aaagtgctta tggttactgt -661  
 ataacctgct ggtagggatt tcatttttctt tattgcagag gcccacac agattgctt -601  
 gttgtgttta tatttaaaaa aaaaaaaaaat gttccctcag gttcccagcc atctgcttc -541  
 tatacttttc tctgtgaaac aaggagacag atcagttcta cgtgggcaa ttgggagggg -481  
 aggcagctta ggacagggca gaattctttc tgcagagcc gatgccata ctgggcatct -421  
 ctgcagactc ttgggctccc tccaccctg ctgagatgat gcactgggaa aacacgctc -361  
 ctcccctgga tgcctctctg taggtttata gctgggaaa cgttgctc agtctaaaat -301  
 atctgcccaa actgcctagc tctgatgaag gctttctcac aggctctcag ctcccgcctc -241  
 gcactcccc cctctgctg ccagaacctt ggggatgtgc ctagaccgc ccagagcac -181  
 gtccctagcca actgagagca gaacaaacct ctggcaaca gccagaggc tcctcccag -121  
 ccaccgccc ccgccagc ctttcccc tctatacaat acaagatctt ccttctcag -61  
 TSS →  
 ttctcttaa tcaagccca gggaaacctc ctcaagcct gcagccagcc accgcccagc -1  
 CDS →  
 ATG tctgggg gcaataact agactcag gtaggcttgg gtgagggctc caaagtgcct +60  
 gcttttgcta tcttccactc caaatgctc gactgctttc ctgccccag ccgctctcc +120  
 accttcgctg cactcagct ggcaccttgg aggaatggc tgggtgggga ggtgaaaagc +180  
 taggaatgtc ttagggcttc cttttggaga ggagaccaat ggagccaaaa ggggaaagaa +240  
 ggagaccggt tctgccagac ttagaaaagt tttccagatg acagttcgc gagaccac +300  
 tgcggtccag ccgtaccta ctgggaggct tagggctgct gctcagtgtg tgtgtgtgtg +360  
 tgtgtgtgtg tgtgtgtgtg tgtgtgtgtg tgtgtgtgtg tgtgttggg ggaaggagat +420

tcatttgac agtgtcccc caccacaacc cccaggagc ctaaagtggc tggcttgggc +480

38
39
40
41  
 agcgcatgc gtgtattgca cttageaag ttctcagaa cttcaatagt tttttctgcc +520

42-43
44  
 cctgagaggc ccggcggg ggagtccga ggtgggggaa gcctccttc tccctcacia +600

45
46
47  
 gtaccaccgc cattgtcaac tccttcttgg cactcagggt gactaaact ggagaccgc +660

48  
 gttcccaaat agggctaega ttcagcttgg agtagacagc ctgagagtga tctaagtaag +720

ggtgggtcag gcagttcttc agatggcatg tcctctgggg catgggggtg ggggtgacag +780

gtcttggcac atgcctcagc ctaaagaagt atgttagatt gtgagccact tattcacccc +840

49  
 cacggcctaa gaaaaaccag ggagtaaagg tgggttttaa aaggggtag gggctgtggc +900

50
51  
 aggtgcaagg aagaagcaeg gagggacagt gaagatggga ccattacgc tgtcagtttg +960

gtccagagtg atcttgataa tgttgaaagg gaccttagga cagtgttaag ggtaagaga +1020

52
53  
 gggaccaeg agcagggtgag gttgtgggt cataggtctg gcgagagaa ggaatacaga +1080

54
55
56  
 ggaggaggaa ccggaaacccc agcccctggg ctggggagtc agggccgaga gccctgggga +1140

57
58
59-60-61-62
63  
 gcaggagggc gcatgggact tcgacctgac cctggcgc ggcgcgga ggcaggcct +1200

64
65
66
67  
 ctctgcctgg taccagggg tgtggtgtcc tccctcct cctcttaaaa agcttgagc +1260

68
69  
 gctggagttt tctgtgtgca agcctttcct tcgaggttga agctagcaaa agttgtagc +1320

70  
 ccaggctacc ccgcacagc caggctgact ctgactctt gttttcttt ctgaactttt +1380

**Figure S1: Genomic localization and nucleotide sequence of the Caveolin 1 gene analyzed in this work by MassArray Epityper technique.** CpG dinucleotides located in the proximal promoter, exon 1 and intron 1 of the Cav-1 gene (from -619 to 1272 pb from ATG codon (+1)) are shadowed. ATG codon indicates the Translation Start Site (CDS) and TSS indicates the Transcription Start Site. Due to the limitation of the technique, DNA methylation of some CpGs sites could not be measured (crossed out), or were measured together with others (indicated as boxed CpGs sites).
