# Supplementary material for: Expression of Caveolin 1 Is Enhanced by DNA Demethylation during Adipocyte Differentiation. Status of Insulin Signaling
Source: PubMed Central journal article supplement (PMC3994010; doi:10.1371/journal.pone.0095100), 2014-04-21
Supplement: pone.0095100.s002.pdf [file pone.0095100.s002.pdf]

**Figure S2: Caveolin-1 CpG sites sequence localization, methylation changes during adipogenesis and possible regulatory transcription factors associated to these sequences \*. $p \leq 0,05$ , \*\* $p \leq 0,01$ .**

|                  | <b>Seq. Location</b>   | <b>Day 0(%Me t)</b> | <b>Day 21(%Me t)</b> | <b>Change( % Met)</b> | <b>p</b> | <b>Trascription factors</b>         |
|------------------|------------------------|---------------------|----------------------|-----------------------|----------|-------------------------------------|
| <b>CpG 1</b>     | -618                   | 72,58               | 70,93                | 1,65                  | 0,73     |                                     |
| <b>CpG 2</b>     | -601                   | 47,92               | 42,20                | 5,72                  | 0,19     |                                     |
| <b>CpG 3</b>     | -546                   | 27,92               | 25,53                | 2,38                  | 0,19     |                                     |
| <b>CpG 4-5</b>   | -500, -494             | 29,25               | 26,53                | 2,72                  | 0,11     |                                     |
| <b>CpG 6</b>     | -442                   | 17,33               | 13,13                | 4,20                  | 0,19     |                                     |
| <b>CpG 7-8</b>   | -366, -364             | 6,50                | 7,73                 | -1,23                 | 0,56     |                                     |
| <b>CpG 9-10</b>  | -320, -312             | 6,08                | 7,37                 | -1,28                 | 0,19     |                                     |
| <b>CpG 11-12</b> | -245, -242             | 21,83               | 10,53                | 11,30                 | *0,016   | CBF, AP-2, WT1                      |
| <b>CpG 13</b>    | -232                   | 2,83                | 5,20                 | -2,37                 | 0,19     |                                     |
| <b>CpG 14-15</b> | -193, -190             | 0,60                | 0,93                 | -0,33                 | 0,42     |                                     |
| <b>CpG 16</b>    | -181                   | 5,13                | 4,70                 | 0,43                  | 0,69     |                                     |
| <b>CpG 17</b>    | -146                   | 0,33                | 1,40                 | -1,07                 | 0,31     |                                     |
| <b>CpG 18-19</b> | -116, -108             | 1,67                | 2,92                 | -1,25                 | 0,34     |                                     |
| <b>CpG 20</b>    | -103                   | 5,50                | 6,33                 | -0,83                 | 0,69     |                                     |
| <b>CpG 21-22</b> | -8, -6                 | 2,87                | 4,20                 | -1,33                 | 0,15     |                                     |
| <b>CpG 23</b>    | +18                    |                     |                      |                       |          |                                     |
| <b>CpG 24</b>    | +27                    | 27,25               | 16,13                | 11,13                 | *0,029   | TFII-I, SREBP                       |
| <b>CpG 25</b>    | +89                    | 11,53               | 8,42                 | 3,12                  | *0,016   | p300                                |
| <b>CpG 26</b>    | +103                   | 20,47               | 18,60                | 1,87                  | 0,15     |                                     |
| <b>CpG 27</b>    | +113                   | 23,46               | 25,07                | -1,61                 | 0,29     |                                     |
| <b>CpG 28-29</b> | +126,<br>+128          | 8,53                | 10,73                | -2,20                 | **0,008  | WT1, CBF,<br>HES1,deltaEF1          |
| <b>CpG 30</b>    | +135                   | 10,67               | 15,25                | -4,58                 | 0,20     |                                     |
| <b>CpG 31</b>    | +248                   | 6,08                | 5,40                 | 0,68                  | 0,19     |                                     |
| <b>CpG 32-34</b> | +284,<br>+288,<br>+291 | 18,50               | 8,50                 | 10,00                 | *0,016   | TGIF, AhR, Arnt,<br>HIF-1, AP1, CBF |
| <b>CpG 35</b>    | +303                   | 21,08               | 11,12                | 9,97                  | *0,016   | CBF                                 |
| <b>CpG 36</b>    | +313                   | 15,17               | 6,78                 | 8,38                  | *0,016   |                                     |
| <b>CpG 37</b>    | +407                   |                     |                      |                       |          |                                     |
| <b>CpG 38</b>    | +483                   | 4,83                | 1,67                 | 3,17                  | *0,016   | AhR, Arnt, CBF.                     |
| <b>CpG 39</b>    | +490                   | 9,33                | 2,33                 | 7,00                  | *0,016   | AhR, Arnt, HIF-1,<br>USF2           |
| <b>CpG 40</b>    | +506                   |                     |                      |                       |          |                                     |
| <b>CpG 41</b>    | +515                   | 11,92               | 6,67                 | 5,25                  | *0,016   | p300                                |
| <b>CpG 42-43</b> | +552, -556             | 12,42               | 13,80                | -1,38                 | 0,91     |                                     |
| <b>CpG 44</b>    | +568                   | 2,88                | 1,80                 | 1,08                  | *0,016   | CBF, YY1, WT1                       |
| <b>CpG 45</b>    | +608                   | 29,33               | 21,47                | 7,87                  | *0,032   | CBF, HIF-1, AhR,<br>Arnt            |
| <b>CpG 46</b>    | +648                   | 4,83                | 1,67                 | 3,17                  | *0,016   | C/EBP beta, c-ETS-<br>1             |
| <b>CpG 47</b>    | +659                   | 3,42                | 4,47                 | -1,05                 | 0,73     |                                     |

|                  |                                     |       |       |       |        |                                |
|------------------|-------------------------------------|-------|-------|-------|--------|--------------------------------|
| <b>CpG 48</b>    | +678                                |       |       |       |        |                                |
| <b>CpG 49</b>    | +843                                | 2,88  | 1,80  | 1,08  | *0,016 | CBF, AhR, Arnt,<br>HIF-1, AP-2 |
| <b>CpG 50</b>    | +919                                |       |       |       |        |                                |
| <b>CpG 51</b>    | +947                                | 71,71 | 70,70 | 1,01  | 0,41   |                                |
| <b>CpG 52</b>    | +1028                               |       |       |       |        |                                |
| <b>CpG 53</b>    | +1062                               | 1,42  | 1,20  | 0,22  | 0,41   |                                |
| <b>CpG 54</b>    | +1091                               | 75,88 | 75,67 | 0,21  | 1,00   |                                |
| <b>CpG 55</b>    | +1126                               | 1,33  | 1,43  | -0,10 | 0,73   |                                |
| <b>CpG 56</b>    | +1133                               | 1,63  | 2,03  | -0,41 | 0,56   |                                |
| <b>CpG 57</b>    | +1150                               | 1,33  | 1,43  | -0,10 | 0,73   |                                |
| <b>CpG 58</b>    | +1162                               | 24,42 | 19,03 | 5,38  | *0,016 | ER, LXR alpha,<br>RXR alpha    |
| <b>CpG 59-62</b> | +1177,<br>+1180,<br>+1184,<br>+1186 | 64,42 | 42,30 | 22,12 | *0,016 | AP-2, AP-1, CBF                |
| <b>CpG 63</b>    | +1197                               | 3,25  | 2,10  | 1,15  | 0,29   |                                |
| <b>CpG 64</b>    | +1214                               |       |       |       |        |                                |
| <b>CpG 65</b>    | +1233                               |       |       |       |        |                                |
| <b>CpG 66</b>    | +1238                               |       |       |       |        |                                |
| <b>CpG 67</b>    | +1260                               | 8,79  | 4,87  | 3,93  | *0,032 | p300                           |
| <b>CpG 68</b>    | +1292                               | 4,75  | 3,07  | 1,68  | 0,06   |                                |
| <b>CpG 69</b>    | +1319                               | 93,79 | 92,57 | 1,22  | 0,73   |                                |
| <b>CpG 70</b>    | +1333                               | 0,92  | 1,93  | -1,02 | 0,41   |                                |
