# Supplementary material for: Expression of Caveolin 1 Is Enhanced by DNA Demethylation during Adipocyte Differentiation. Status of Insulin Signaling
Source: PubMed Central journal article supplement (PMC3994010; doi:10.1371/journal.pone.0095100), 2014-04-21
Supplement: pone.0095100.s003.pdf [file pone.0095100.s003.pdf]

**Insulin Receptor: Mus musculus strain C57BL/6J chromosome 8,  
GRCm38.p1 C57BL/6J, from 19521 bp to 20367 bp.**

NCBI Reference Sequence: NC\_000074.6

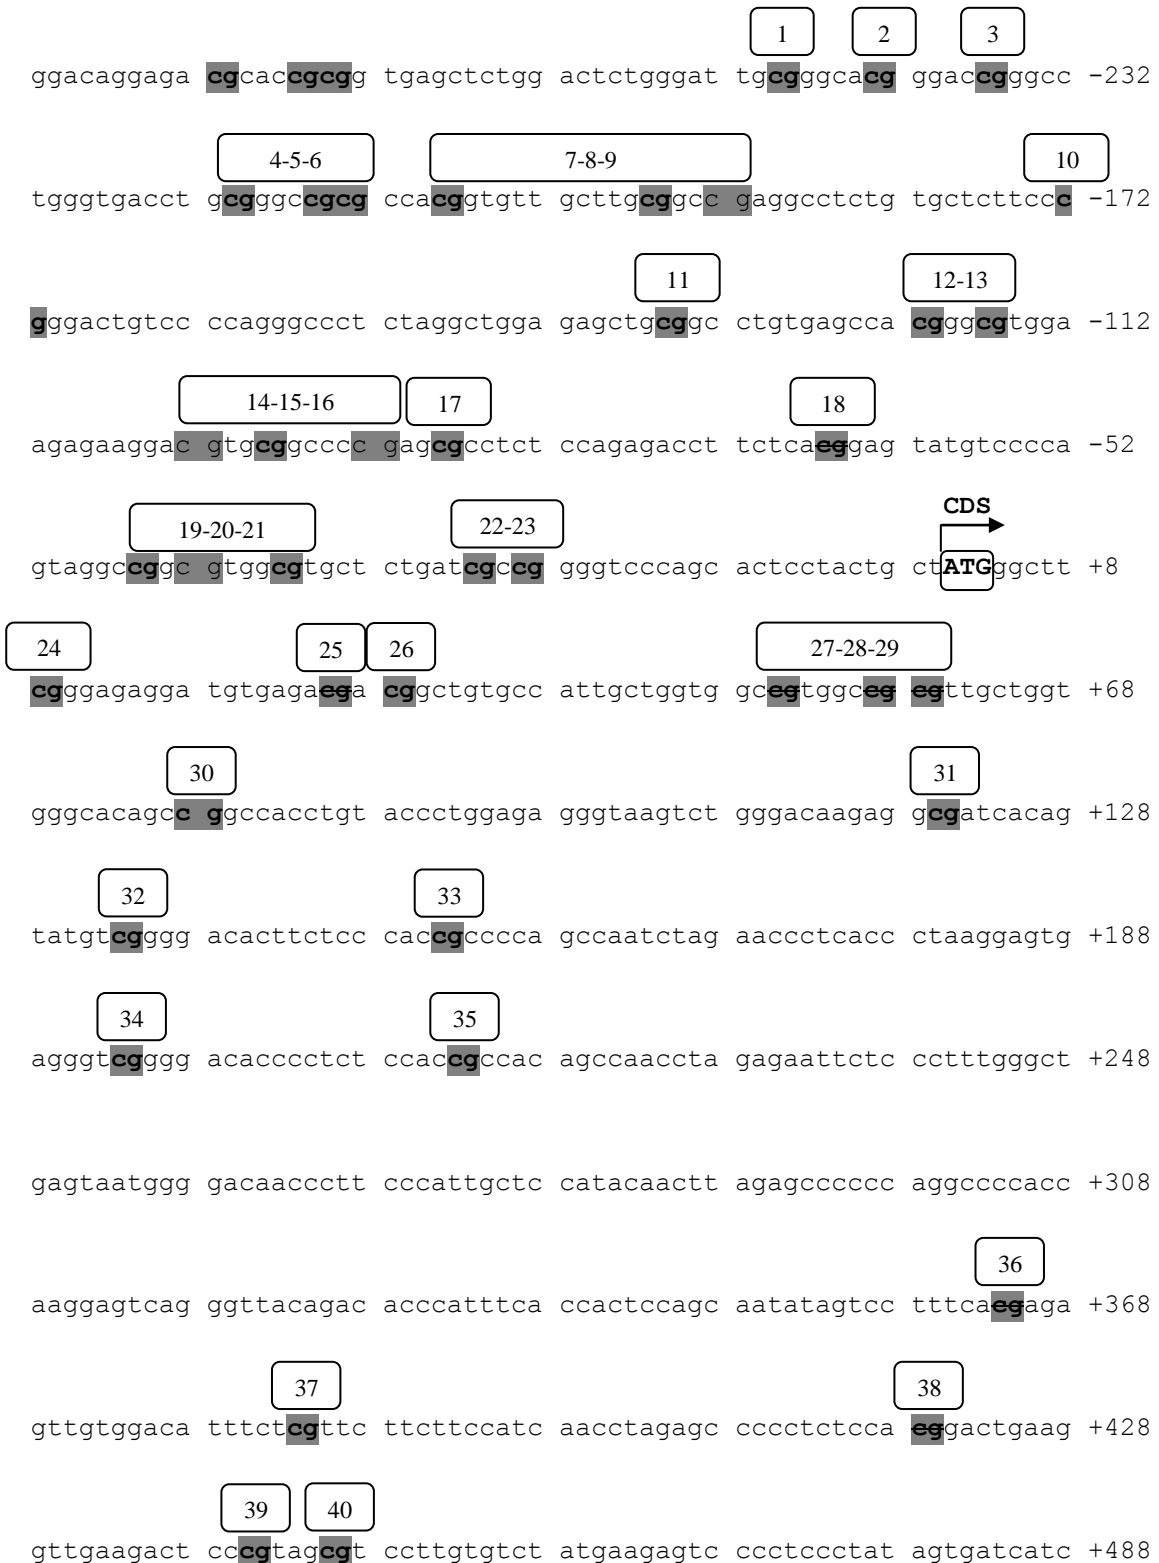

tttacactgg ggaaggggaa gagtggggtt ggtggccctg gccctg<sup>41</sup>cg<sup>42</sup>tg aaaccc<sup>42</sup>cggc +548

**Figure S3: Genomic localization and nucleotide sequence of the Insulin Receptor gene analyzed in this work by MassArray Epityper technique.** CpG dinucleotides are located in the exon and intron 1 of the Cav-1 gene (from -249 to 445 pb from ATG codon (+1)) are shadowed. ATG codon indicates the Translation Start Site (CDS). Due to the limitation of the technique, DNA methylation of some CpGs sites could not be measured (crossed out), or were measured together with others (indicated as boxed CpGs sites).
