# Supplementary material for: Expression of Caveolin 1 Is Enhanced by DNA Demethylation during Adipocyte Differentiation. Status of Insulin Signaling
Source: PubMed Central journal article supplement (PMC3994010; doi:10.1371/journal.pone.0095100), 2014-04-21
Supplement: pone.0095100.s004.pdf [file pone.0095100.s004.pdf]

Insulin Receptor: *Mus musculus* strain C57BL/6J chromosome 8, GRCm38.p1 C57BL/6J, from 19521 bp to 20367 bp.

NCBI Reference Sequence: NC\_000074.6

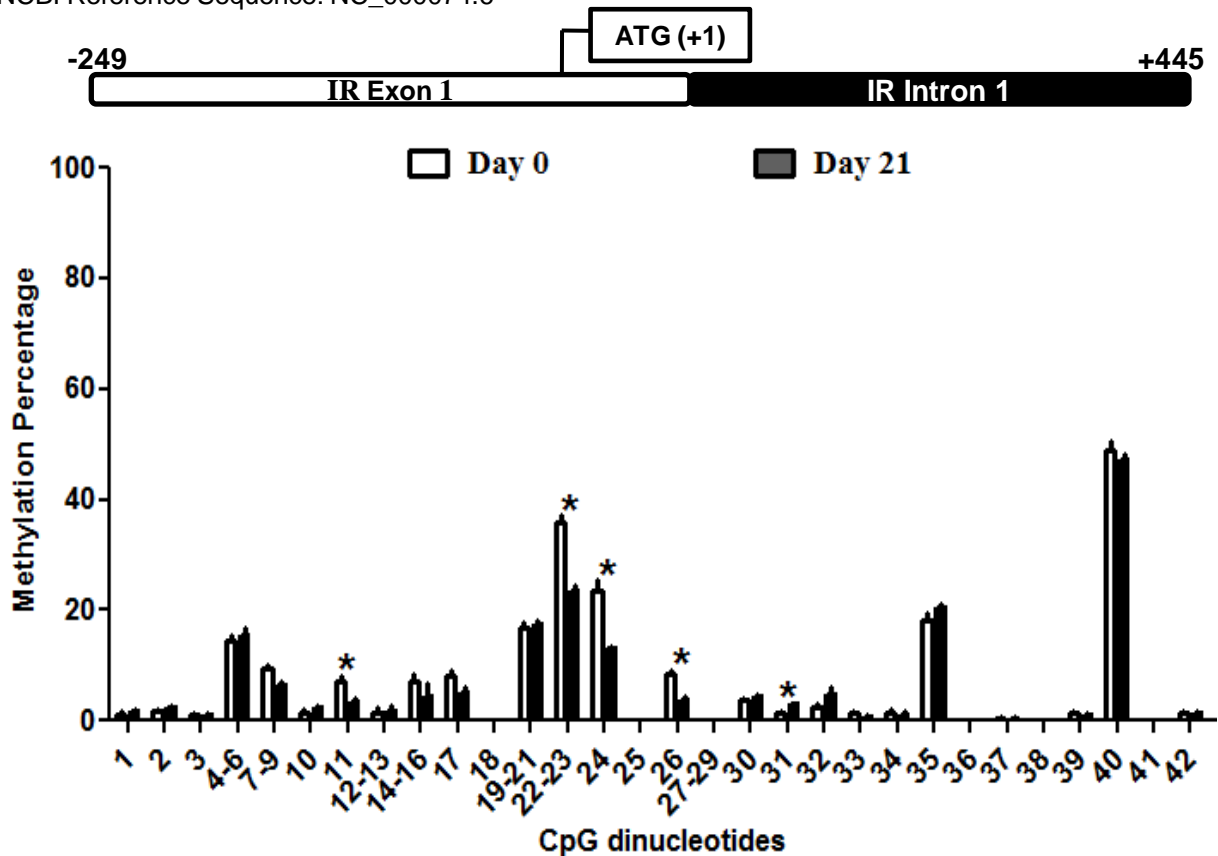

**Figure S4: Methylation levels of the CpG dinucleotides in the insulin receptor (IR) exon and intron 1 throughout 3T3-L1 cell adipogenesis.** The methylation level of 42 CpG sites in IR exon 1 and intron 1 were compared before and after 3T3-L1 adipocytic differentiation. MassARRAY system was used for the quantitative methylation analysis. Data are means  $\pm$  SEM of the methylation percentage of each CpG dinucleotide specified in the figure, at days 0 and 21 of 3T3-L1 adipocyte differentiation. Groups were compared using the Mann-Whitney U test. Significant differences between day 0 and day 21 \*.  $p \leq 0,05$ . Gene structure is schematized over the graphs, indicating the initiation codon (ATG) position.
